# Supplementary material for: Organic ammonium salt-assisted pinhole-free CuSCN films for carbon-based perovskite solar cells
Source: Royal Society of Chemistry journal article supplement (doi:10.1039/d1nj04068e), 2021-01-01
Supplement: d1nj04068e1.pdf [file d1nj04068e1.pdf]

## Supporting Information

# Organic Ammonium Salts-Assisted Pinhole-free CuSCN Film for Carbon-based Perovskite Solar Cells

Zhen He<sup>1,#</sup>, Fanning Meng<sup>1,#</sup>, Lianjie Li<sup>1</sup>, Ligu Gao<sup>1,\*</sup>, Tingli Ma<sup>2,3,\*</sup>

1 State Key Laboratory of Fine Chemicals, Dalian University of Technology, Dalian 116023, China.

2 Department of Materials Science and Engineering, China Jiliang University, Hangzhou, 310018, P. R. China.

3 Graduate School of Life Science and Systems Engineering, Kyushu Institute of Technology, Kitakyushu, Fukuoka 808-0196, Japan.

# These authors contributed equally.

### Corresponding Author

\*Ligu Gao

E-mail: [liguo.gao@dlut.edu.cn](mailto:liguo.gao@dlut.edu.cn); ORCID: 0000-0002-5390-3663.

\*Tingli Ma

E-mail: [tinglima@life.kyutech.ac.jp](mailto:tinglima@life.kyutech.ac.jp); ORCID: 0000-0002-3310-459X.

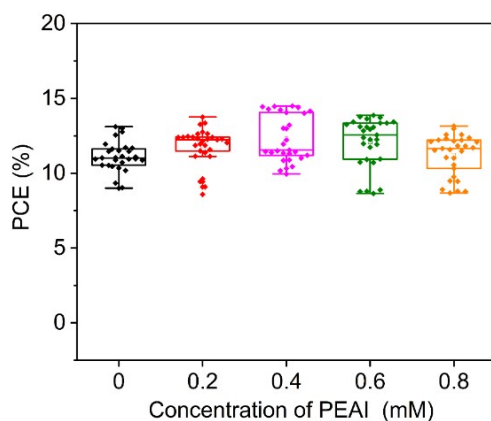

Figure S1. PCE statistical distribution of the cells fabricated using the modified CuSCN at different concentration of PEAI.

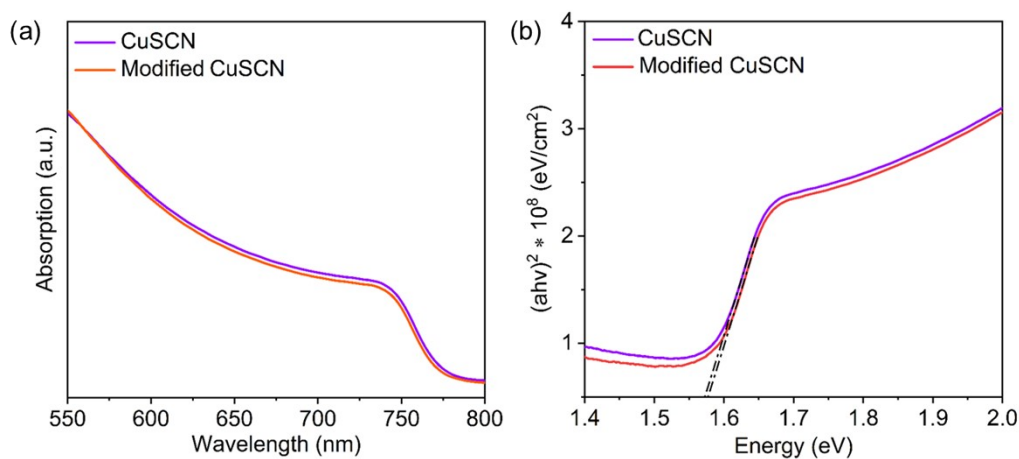

Figure S2. Characterization of the FTO/SnO<sub>2</sub>/perovskite/(pristine or modified) CuSCN samples: (a) UV-Vis spectra and (b) the Tauc plot curves.

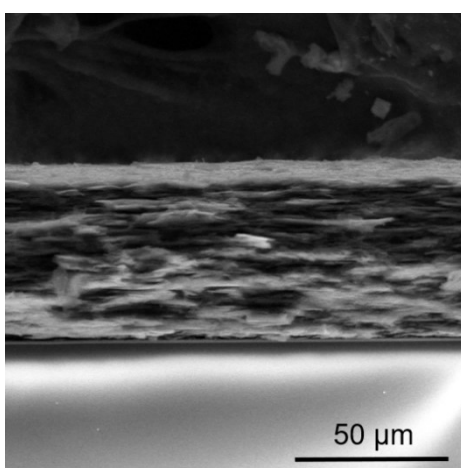

Figure S3. Cross-sectional SEM image of the whole C-PSC, where the thickness of carbon layer is 50  $\mu\text{m}$ .

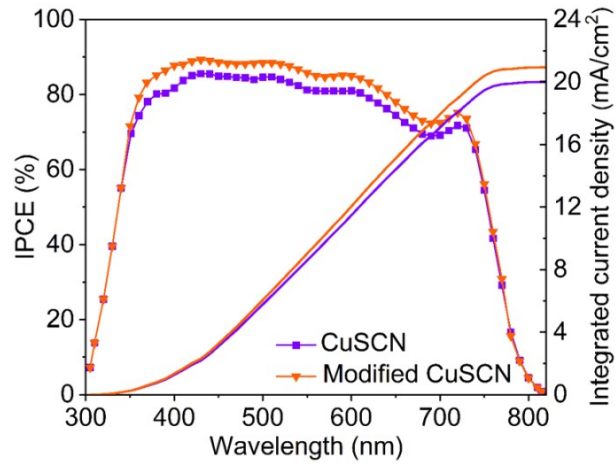

Figure S4. IPCE spectra of C-PSCs based on pristine and modified CuSCN.

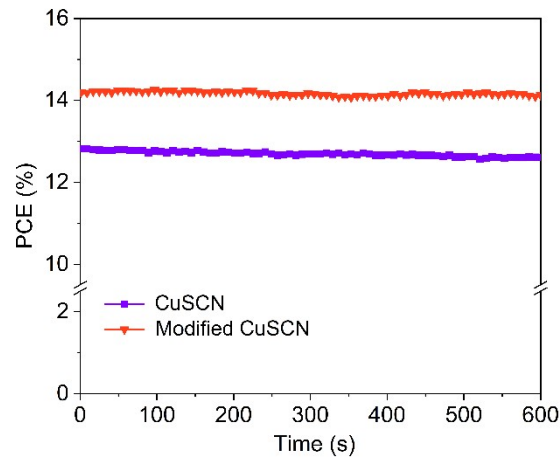

Figure S5. The output tracking of the device based on pristine and modified CuSCN in the maximum power point under AM 1.5G illumination.

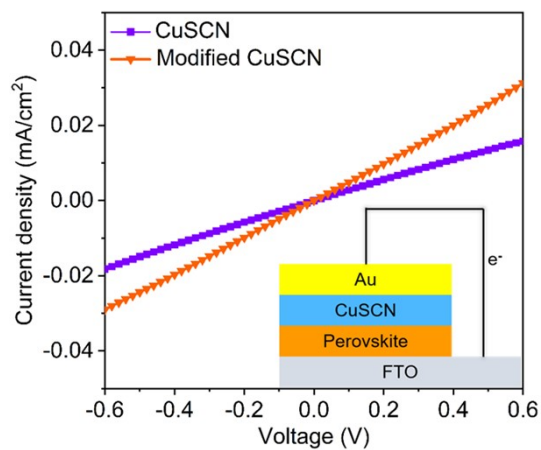

Figure S6. LSV curves of the devices based on pristine and modified CuSCN, and the inset is structure of the device.

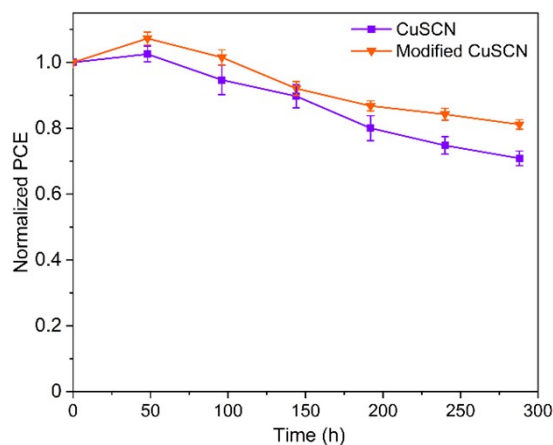

Figure S7. Thermal stability of unencapsulated devices based on pristine and modified CuSCN under 85 °C in environment, and error bars represent statistical data from 5 cells at the same batch.

Table. S1 Photovoltaic parameters of C-PSCs based on pristine and modified CuSCN

| Devices        |          | $V_{oc}$ (V) | $J_{sc}$ (mA·cm <sup>-2</sup> ) | FF          | PCE (%)      |
|----------------|----------|--------------|---------------------------------|-------------|--------------|
| CuSCN          | Champion | 1.04         | 20.87                           | 0.61        | 13.20        |
|                | Average  | 1.02 ± 0.02  | 19.09 ± 1.08                    | 0.58 ± 0.03 | 11.49 ± 0.93 |
| Modified-CuSCN | Champion | 1.09         | 21.62                           | 0.62        | 14.62        |
|                | Average  | 1.07 ± 0.02  | 20.22 ± 0.66                    | 0.59 ± 0.03 | 12.64 ± 1.12 |

Table S2. TRPL parameters of half-devices with FTO/perovskite/(pristine or modified) CuSCN.

| Devices        | $\tau_1$ (ns) | $\tau_2$ (ns) |
|----------------|---------------|---------------|
| CuSCN          | 0.53          | 27.86         |
| Modified CuSCN | 0.41          | 23.75         |
